# Supplementary material for: Investigating recent decadal trends in the Pacific westerly jet in response to various atmospheric forcings using CMIP6 model results and reanalysis data
Source: Copernicus journal article supplement (doi:10.5194/egusphere-2025-4501), 2025-10-04
Supplement: Supplementary file 1 [file egusphere-2025-4501-supplement.pdf]

Supplement of

**Investigating recent decadal trends in the Pacific westerly jet in response to various atmospheric forcings using CMIP6 model results and reanalysis data**

Huisheng Bian<sup>1,2</sup> et al.

Correspondence to: Huisheng Bian ([Huisheng.Bian@nasa.gov](mailto:Huisheng.Bian@nasa.gov)) and Mian Chin ([mian.chin@outlook.com](mailto:mian.chin@outlook.com))

Similar to the North Pacific westerly jet (NPWJ) analyses performed in June–July–August shown in Figures 2–7, Figures S1 and S3–S7 show analyses performed in September–October–November. Figure S2 shows the time series of 200 hPa seasonal zonal wind for the period 1980–2019 averaged over the region of 120°E–240°E and 30°N–45°N for the four reanalysis datasets.

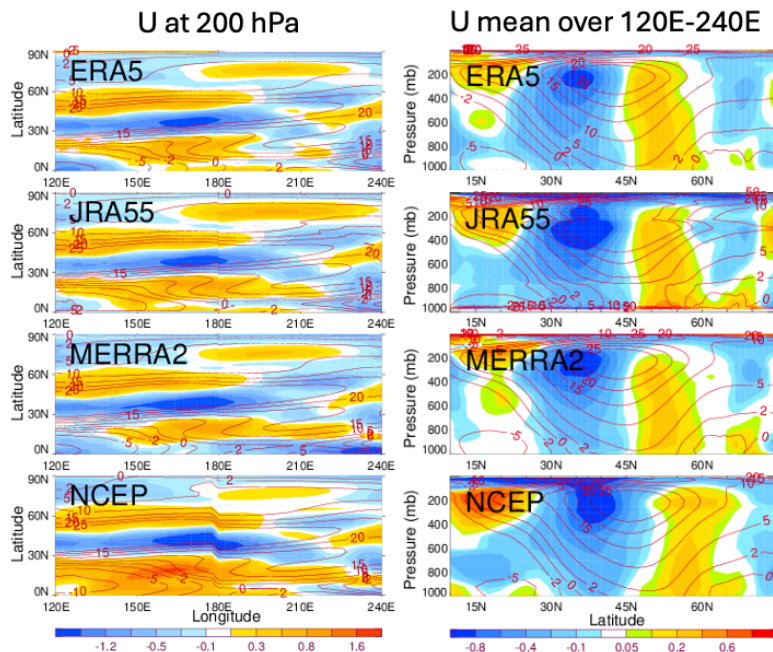

**Figure S1. Similar to Figure 2 but for September–October–November (SON).**

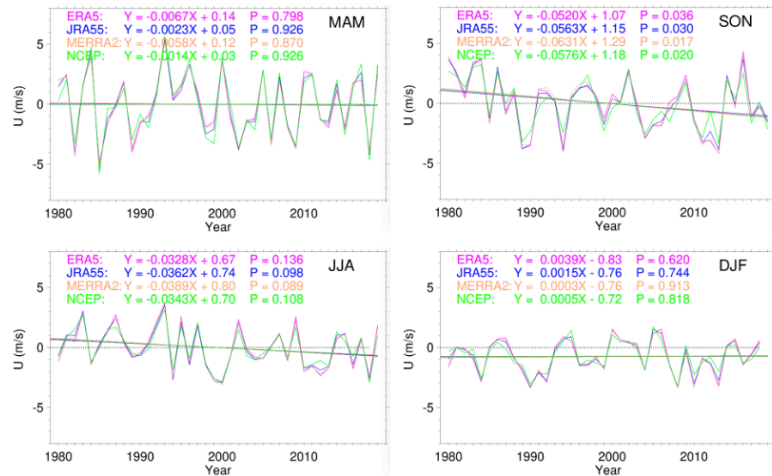

Figure S2. Time series of the averaged zonal wind speed  $U$  over the NPWJ region defined as 120°E - 240°E and 30°N - 45°N for four seasons during 1980-2019 derived from the four reanalysis datasets. The linear trend and its significance are calculated by Kendall's rank correlation.

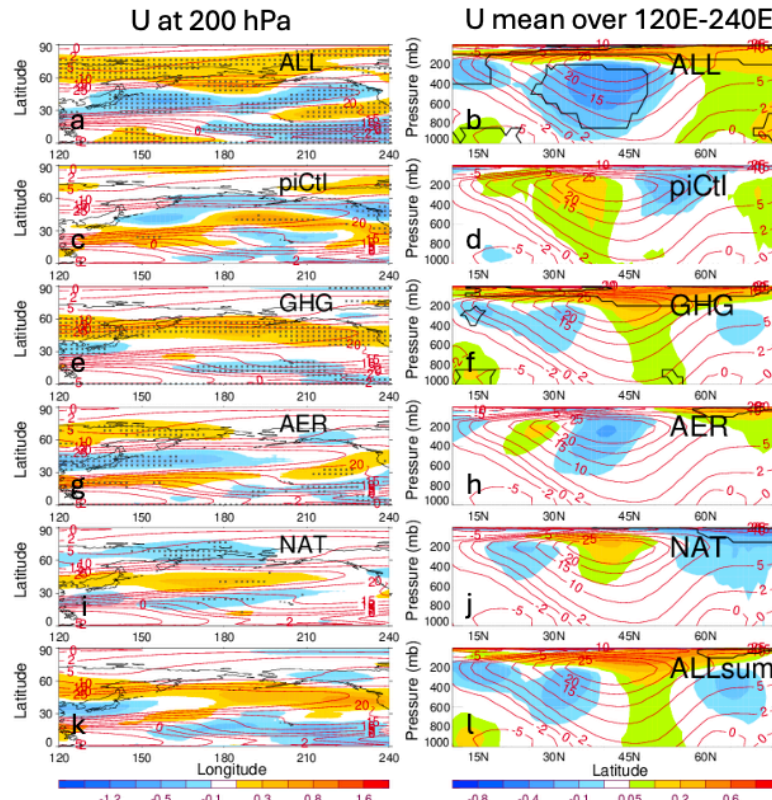

Figure S3. Similar to Figure 3 but for September-October-November (SON).

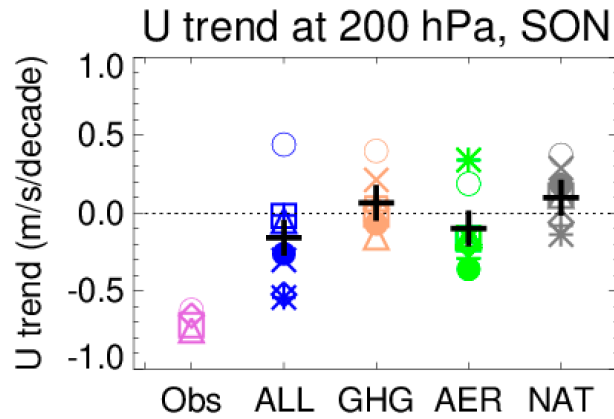

Figure S4. Similar to Figure 4 but for September-October-November (SON).

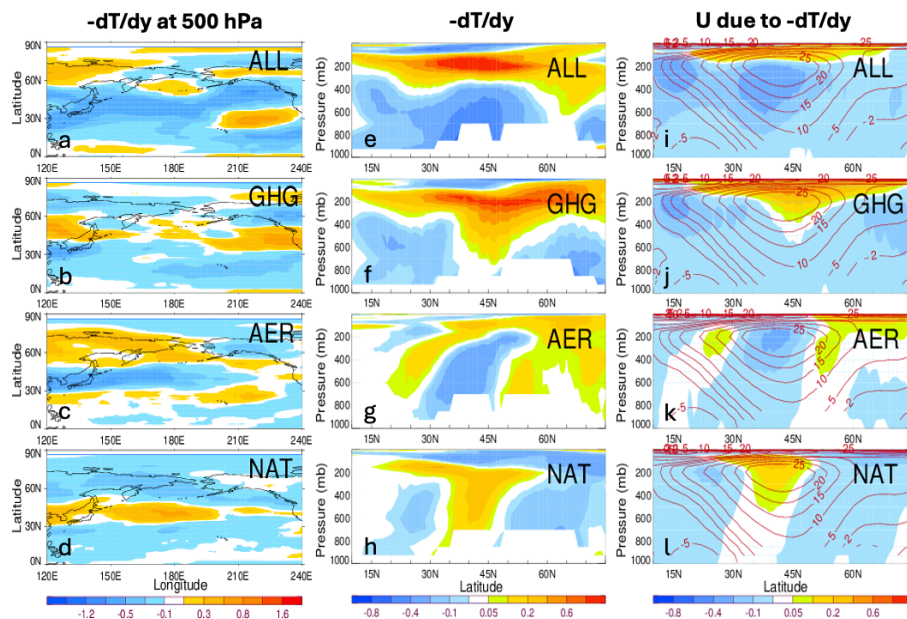

Figure S5. Similar to Figure 5 but for September-October-November (SON).

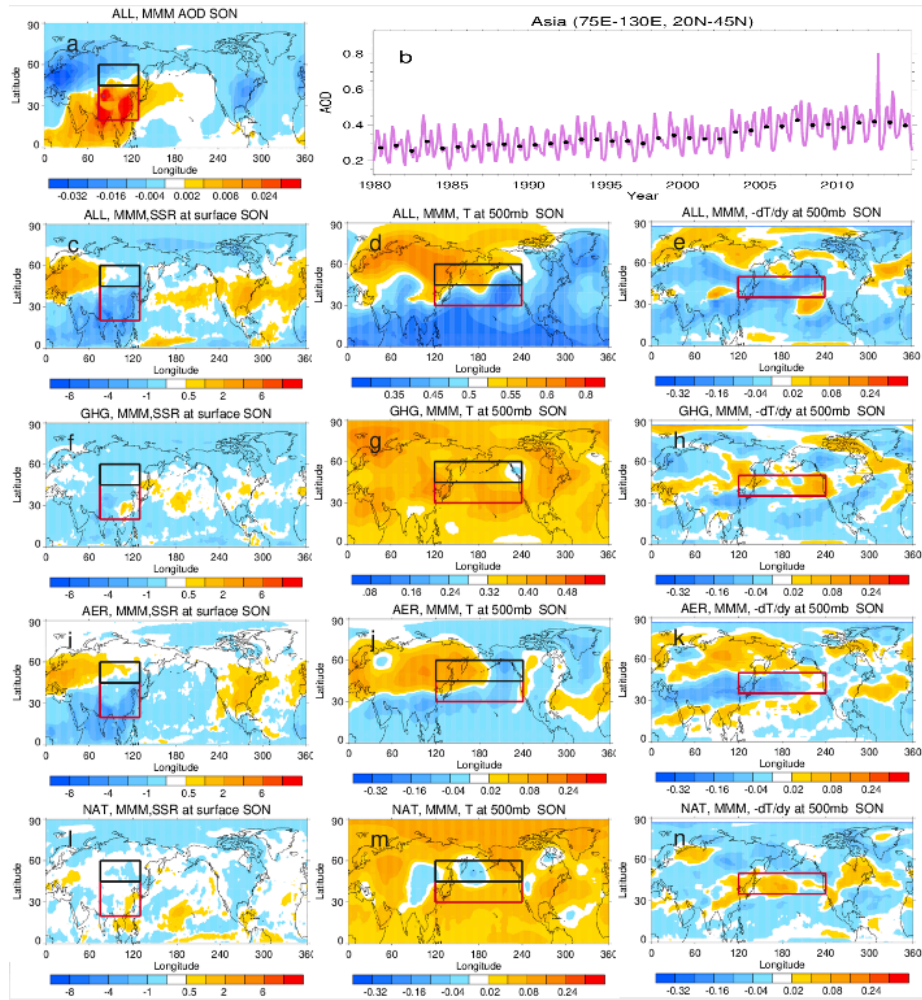

Figure S6. Similar to Figure 6 but for September-October-November (SON).

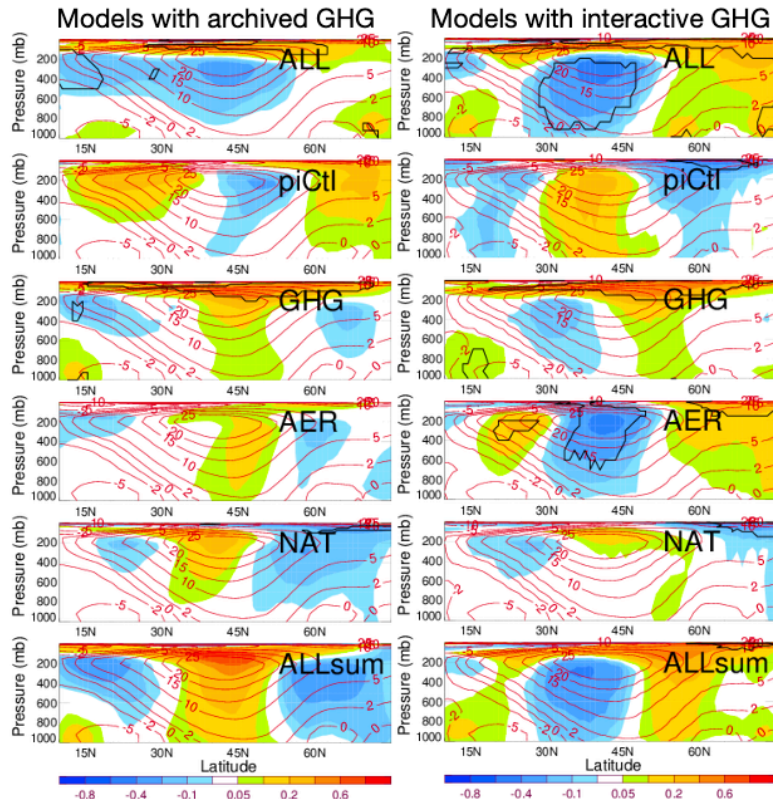

Figure S7. Similar to Figure 7 but for September-October-November (SON).
